# Supplementary material
Source: publisher figshare collection journal article supplement (https://tandf.figshare.com/ndownloader/files/17619881)
Supplement: Supplementary file 1 [file 17619881]

**Appendix 1**

List of recorded lichen, bryophyte and vascular plant taxa with respective occurrence in the sampling sites*: Cab, Cabedelo; Fne, Foz do Neiva; Apu, Apúlia; Amo, Amorosa; Agu, Aguçadoura; Fur, Furadouro; Tor, Torreira; Qui, Quiaios; Sja, São Jacinto; Toc, Tocha. Sites are classified according to their biogeographic context and coastal dynamics.

| Biogeographic context | | Eurosiberian | | | | | | | | | | Mediterranean | | | | | | | | | | | |
| --- | --- | --- | --- | --- | --- | --- | --- | --- | --- | --- | --- | --- | --- | --- | --- | --- | --- | --- | --- | --- | --- | --- | --- |
| Coastal dynamics | | Erosion | | | | | | | Stable | | | Erosion | | | | | | | | Stable | | | |
| Sites | | Cab | | Fne | | Agu | | | Amo | Apu | | Fur | | | | Tor | | Qui | | Sja | | Toc | |
| **Lichen species** | | | | | | | | | | | | | | | | | | | | | | | |
| *Cladonia convoluta* (Lamkey) Cout. | |  | |  | |  |  | | × | × | |  | | × | |  | |  | |  |  | | × |
| *Cladonia foliacea* (Huds.) Willd. | |  | |  | |  |  | | × | × | |  | | × | | × | |  | |  |  | | × |
| *Cladonia furcata* (Huds.) Schrad. | | × | |  | | × |  | | × | × | |  | | × | | × | |  | |  |  | | × |
| *Cladonia humilis* (With.) J.R. Laundon | | × | | × | |  |  | | × |  | |  | |  | | × | |  | |  |  | | × |
| *Cladonia mediterranea* P.A. Duvign & Abbayes | |  | |  | |  |  | |  |  | |  | | × | | × | |  | |  |  | |  |
| *Cladonia mitis* Sandst. | |  | |  | |  |  | |  |  | |  | |  | | × | |  | |  |  | |  |
| *Cladonia ramulosa* (With.) J.R. Laundon | | × | | × | |  |  | | × | × | |  | |  | | × | |  | |  |  | |  |
| *Cladonia rangiferina* (L.) Weber ex F.H. Wigg | |  | |  | |  |  | |  |  | |  | |  | | × | |  | |  |  | |  |
| *Cladonia rangiformis* Hoffm. | | × | | × | | × |  | | × | × | |  | | × | | × | | × | |  |  | |  |
| *Cladonia rei* Schaer. | | × | |  | |  |  | | × |  | |  | |  | |  | |  | |  |  | |  |
| *Collema limosum* (Ach.) Ach. | | × | | × | | × |  | | × |  | |  | |  | | × | |  | |  |  | | × |
| *Diploschistes interpediens* (Nyl.) Zahlbr. | | × | |  | |  |  | |  |  | |  | |  | |  | |  | |  |  | |  |
| *Leptogium cyanescens* (Pers.) Körb. | | × | |  | |  |  | | × |  | |  | |  | |  | |  | |  |  | |  |
| *Parmotrema perlatum*(Hudson) M. Choisy | | × | |  | |  |  | |  |  | |  | |  | | × | |  | |  |  | |  |
| *Peltigera canina* (L.) Willd. | | × | | × | | × |  | | × |  | |  | |  | |  | |  | |  |  | | × |
| *Peltigera didactyla* (With.) J.R. Laundon | | × | |  | |  |  | |  |  | |  | |  | |  | |  | |  |  | |  |
| *Xanthoparmelia protomatrae* (Gyeln.) Hale | |  | |  | |  |  | |  |  | |  | |  | | × | |  | |  |  | |  |
| **Bryophyte species** | | | | | | | | | | | | | | | | | | | | | | | |
| *Brachythecium albicans* (Hedw.) Schimp. | × | | × | | × | |  |  | | |  | |  | |  | |  | |  |  |  | |  |
| *Brachythecium mildeanum* Schimp. (Schimp.) | × | |  | |  | |  | × | | |  | |  | | × | | × | | × |  |  | | × |
| *Bryum caespiticium* Hedw. |  | |  | |  | |  |  | | |  | |  | |  | |  | |  |  |  | |  |
| *Bryum capillare* Hedw. | × | | × | | × | |  | × | | | × | |  | | × | |  | |  |  | × | | × |
| *Campylopus pilifer* Brid. |  | |  | |  | |  | × | | |  | |  | |  | | × | | × |  |  | |  |
| *Cephaloziella divaricata* (Sm.) Schiffn. |  | | × | |  | |  |  | | |  | |  | | × | |  | |  |  |  | |  |
| *Ceratodon purpureus* (Hedw.) Brid. | × | | × | |  | |  |  | | |  | |  | |  | | × | |  |  |  | |  |
| *Didymodon insulanus* (De Not.) M.O. Hill | × | |  | |  | |  |  | | |  | |  | | × | |  | |  |  |  | |  |
| *Kindbergia praelonga* (Hedw.) Ochyra |  | |  | |  | |  |  | | |  | |  | |  | |  | |  |  |  | |  |
| *Hypnum cupressiforme* Hedw. var. *lacunosum* Brid. |  | | × | | × | |  |  | | |  | |  | |  | |  | | × |  |  | |  |
| *Pleurochaete squarrosa* (Brid.) Lindb. | × | | × | | × | |  | × | | |  | |  | | × | | × | | × |  |  | |  |
| *Pseudoscleropodium purum* (Hedw.) M.Fleisch. |  | | × | |  | |  | × | | |  | |  | | × | | × | | × |  |  | | × |
| *Racomitrium elongatum* Ehrh. ex Frisvoll | × | |  | |  | |  |  | | |  | |  | |  | |  | |  |  |  | |  |
| *Syntrichia ruralis* (Hedw.)F.Weber & D.Mohr var. *ruraliformis* (Besch.) Delogne | × | | × | | × | |  | × | | | × | |  | | × | | × | | × |  |  | | × |
| *Tortella flavovirens* (Bruch) Broth. | × | | × | | × | |  | × | | | × | |  | |  | | × | | × |  | × | | × |
| **Vascular plant species** | | | | | | | | | | | | | | | | | | | | | | | |
| *Artemisia campestris* subsp. *maritima* (D.C.) Arcang. | × | | × | | × | |  | × | | | × | |  | | × | | × | | × |  |  | |  |
| *Acacia longifolia* (Andrews) Willd. | × | |  | |  | |  | × | | | × | |  | |  | | × | | × |  | × | | × |
| *Ammophila arenaria* (L.) Link | × | | × | | × | |  | × | | | × | |  | | × | | × | | × |  | × | | × |
| *Anthyllis vulneraria*L. subsp.*iberica*(W. Becker) Jalas ex Cullen |  | | × | | × | |  |  | | |  | |  | |  | |  | |  |  | × | |  |
| *Antirrhinum linkianum* Boiss. & Reut. |  | |  | |  | |  | × | | | × | |  | | × | |  | | × |  | × | |  |
| *Carpobrotus edulis* (L.) N.E. Br. |  | |  | | × | |  |  | | |  | |  | |  | |  | | × |  |  | | × |
| *Cistus salvifolius* L. |  | | × | | × | |  | × | | | × | |  | |  | |  | |  |  |  | |  |
| *Coincya monensis* (L.) Greuter & Burdetvar. *johnstonii*(Samp.) |  | |  | |  | |  |  | | | × | |  | | × | |  | |  |  |  | |  |
| *Corema album* (L.) D. Don |  | |  | |  | |  | × | | |  | |  | | × | | × | |  |  |  | | × |
| *Corynephorus canescens* (L.) P. Beauv. | × | | × | |  | |  |  | | |  | |  | |  | | × | | × |  |  | |  |
| *Crucianella maritima* L. | × | | × | | × | |  |  | | |  | |  | | × | | × | | × |  | × | | × |
| *Cuscuta australis* R. Br. |  | |  | |  | |  |  | | | × | |  | |  | |  | |  |  |  | | × |
| *Cyperus capitatus* Vand. |  | |  | |  | |  |  | | |  | |  | |  | | × | | × |  | × | | × |
| *Eryngium maritimum* L. | × | | × | | × | |  |  | | |  | |  | |  | | × | | × |  | × | |  |
| *Evax pygmaea* subsp. *ramosissima* (Mariz) R. Fern. & I. Nogueira |  | |  | |  | |  | × | | | × | |  | |  | | × | |  |  | × | |  |
| *Helichrysum italicum* (Roth) G. Don | × | | × | | × | |  | × | | |  | |  | | × | | × | | × |  | × | | × |
| *Herniaria ciliolata* Melderis |  | | × | | × | |  | × | | | × | |  | | × | | × | | × |  |  | | × |
| *Iberis procumbens* Lange |  | |  | |  | |  | × | | | × | |  | | × | | × | | × |  | × | | × |
| *Jasione maritima*  (Duby) L.M.Dufour ex Merino |  | |  | |  | |  |  | | | × | |  | |  | |  | |  |  |  | |  |
| *Lagurus ovatus* L. | × | | × | |  | |  |  | | |  | |  | |  | |  | |  |  |  | | × |
| *Linaria polygalifolia* Hoffmanns. & Link | × | | × | | × | |  |  | | |  | |  | | × | |  | |  |  |  | |  |
| *Malcolmia littorea* (L.) R. Br. | × | |  | | × | |  | × | | | × | |  | |  | |  | |  |  | × | | × |
| *Medicago littoralis* Loisel. |  | |  | |  | |  | × | | | × | |  | |  | |  | |  |  |  | |  |
| *Medicago marina* L. | × | | × | | × | |  | × | | | × | |  | | × | | × | | × |  | × | | × |
| *Orobanche purpurea* Jacq. |  | |  | |  | |  | × | | |  | |  | | × | | × | |  |  | × | | × |
| *Pancratium maritimum* L. | × | |  | | × | |  | × | | | × | |  | |  | |  | |  |  |  | |  |
| *Paronychia argentea* Lam. |  | |  | |  | |  | × | | | × | |  | |  | |  | |  |  |  | |  |
| *Pinus pinaster* L. | × | |  | |  | |  |  | | | × | |  | |  | |  | |  |  |  | |  |
| *Polypodium cambricum* L. | × | |  | | × | |  |  | | | × | |  | | × | |  | |  |  |  | |  |
| *Rubia peregrina* L. |  | |  | |  | |  |  | | |  | |  | |  | |  | |  |  |  | |  |
| *Rumex acetosa* L. |  | | × | |  | |  | × | | | × | |  | | × | | × | | × |  | × | | × |
| *Sedum album* L. |  | |  | |  | |  |  | | |  | |  | |  | |  | |  |  | × | |  |
| *Sedum arenarium* Brot. |  | |  | |  | |  |  | | | × | |  | |  | |  | |  |  |  | |  |
| *Sedum sediforme* (Jacq.) Pau |  | |  | |  | |  |  | | |  | |  | |  | |  | | × |  |  | |  |
| *Seseli tortuosum* L. | × | | × | | × | |  |  | | |  | |  | |  | | × | | × |  | × | |  |
| *Trifolium campestre* Schreb. |  | |  | |  | |  |  | | |  | |  | | × | |  | | × |  | × | | × |
| *Verbascum simplex* Hoffmanns. & Link |  | |  | |  | |  | × | | | × | |  | |  | |  | | × |  |  | | × |
| *Vulpia alopecuros*  (Schousb.) Link | × | | × | | × | |  |  | | | × | |  | | × | |  | |  |  |  | |  |

*Coordinates of sampling sites (W, N): Cabedelo (-08º 49' 57,000; 41º 40' 47,000); Amorosa (-08º 49' 34,159; 41º 38' 58,803); Foz do Neiva (-08º 48' 26,028; 41º 36' 20,056); Apúlia (-08º 46' 29,500; 41º 20' 30,400); Aguçadoura (-08º 46' 45,210; 41º 26' 35,252); Furadouro (-08º 40' 42,71; 40º 51' 54,801); Torreira (-08º 42' 47,000; 40º; 45' 27,800); São Jacinto (-08º 44' 39,97; 40º 40' 31,515); Tocha (-08º 50' 47,774; 40º 19' 29,223); Quiaios (-08º 53' 26,000; 40º 13' 20,000).
